# Supplementary material
Source: publisher site journal article supplement (https://www.spandidos-publications.com/7490/downloadSupplementary)

Figure S1. Chest CT imaging from March 2019. An irregular, heterogeneously enhancing soft tissue mass measuring approximately 3.0x4.5 cm is observed in the left hilum, with compressive changes noted in the left lower lobe bronchus. Multiple enlarged lymph nodes are identified within the mediastinum, including enlargement of the left lower paratracheal (group 4L) lymph nodes, left hilar (group 10) lymph nodes and paraesophageal (group 8) lymph nodes, some of which show partial fusion.

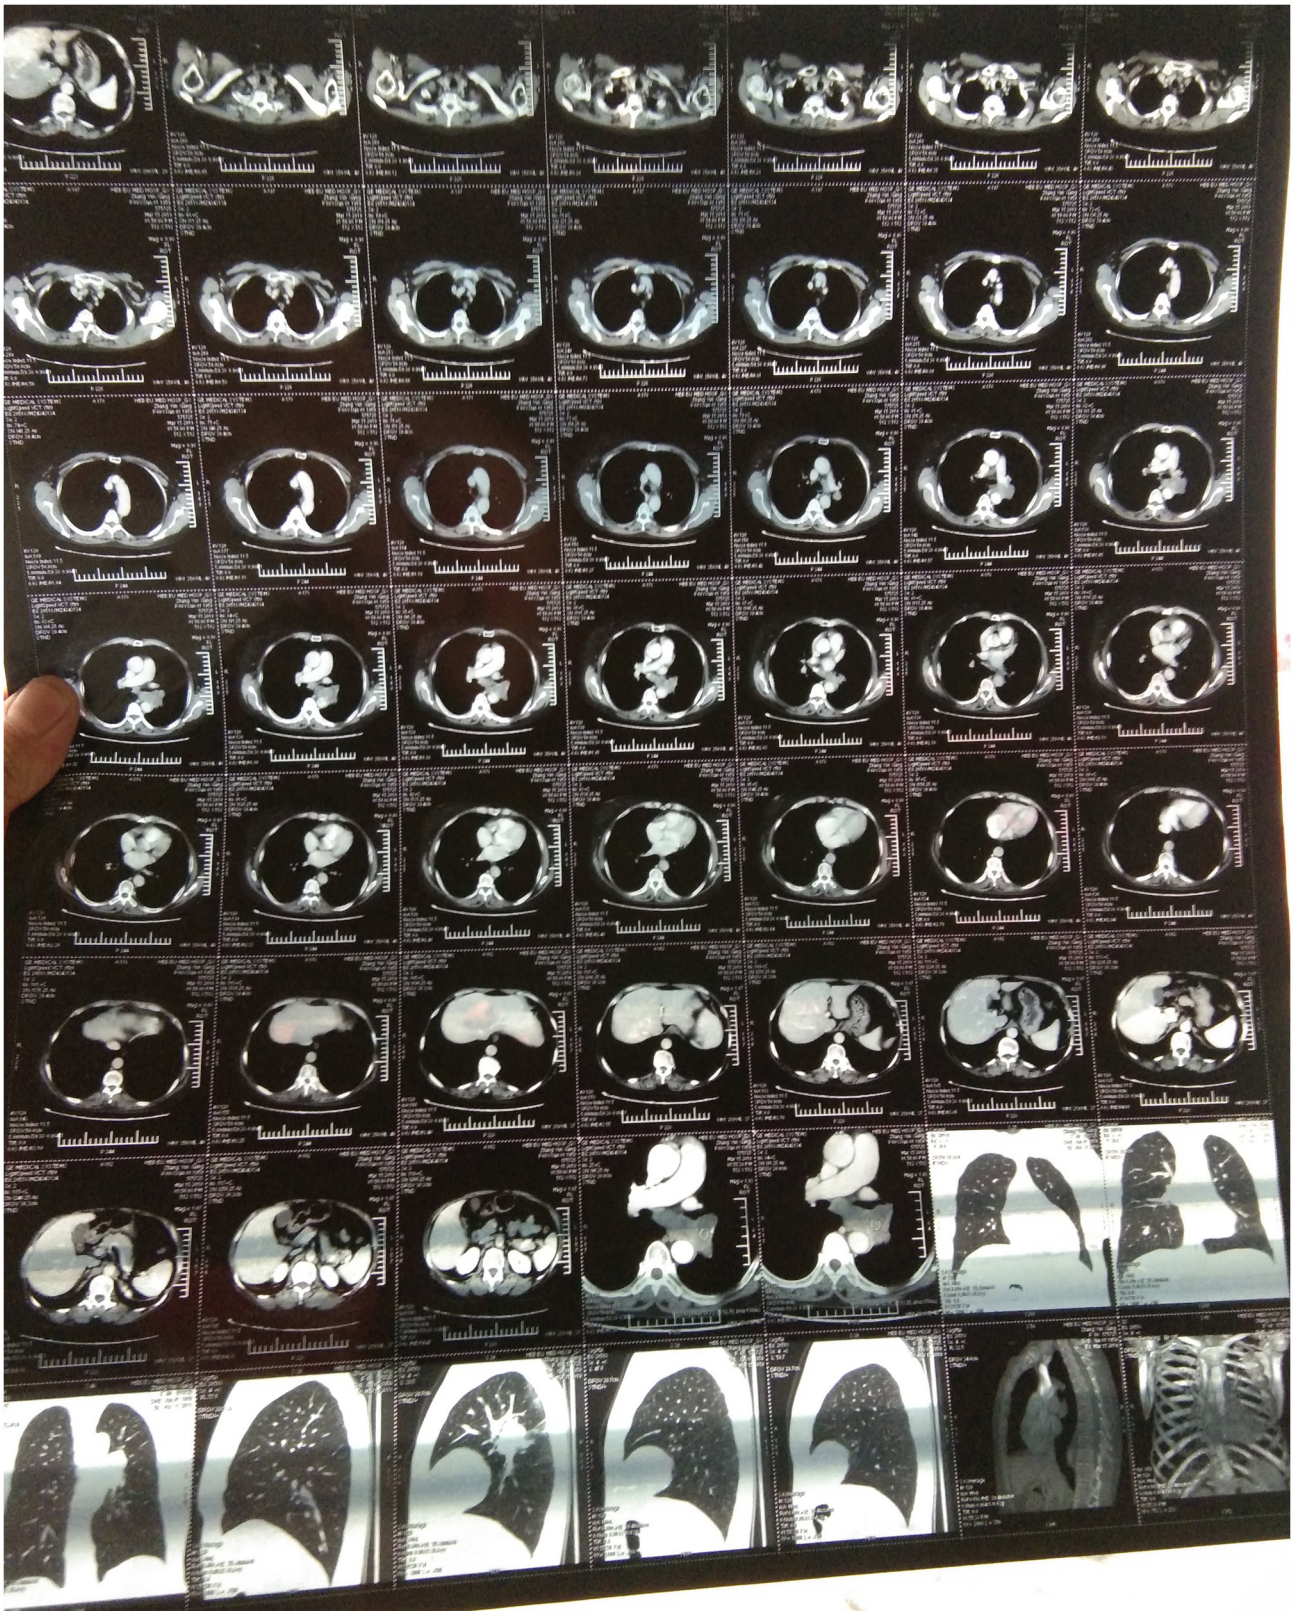

Supplement: Supplementary file 1 [file downloadSupplementary]
